# Supplementary material for: 3K3A-Activated Protein C Inhibits Choroidal Neovascularization Growth and Leakage and Reduces NLRP3 Inflammasome, IL-1β, and Inflammatory Cell Accumulation in the Retina
Source: MDPI journal article supplement (doi:10.3390/ijms241310642), 2023-06-26
Supplement: s1 [file s1]

**Table S1.** Effect of 3K3A-APC on the status of laser lesions estimated by a generalized estimating equation.

| Dependent variables | Independent variables | B     | SE of B | <i>P</i> value | Odds Ratio | 95% CI for Odds Ratio |        |
|---------------------|-----------------------|-------|---------|----------------|------------|-----------------------|--------|
| Non-leaking lesion  | Intercept             | −0.45 | 0.55    | 0.412          | 0.64       | 0.22                  | 1.87   |
|                     | 3K3A-APC treatment    | 3.02  | 1.14    | 0.008          | 20.43      | 2.19                  | 190.50 |

Note: In the generalized estimating equation, the lesion status (“leaking” or “non-leaking”) is a binary outcome and 3K3A-APC treatment (“no” or “yes”) is a between-subjects factor. B, unstandardized coefficient; SE, standard error; CI, confidence interval; APC, activated protein C.

**Table S2.** Relationship between the lesion status (“leaking” or “non-leaking”) and VEGF volume estimated by a linear mixed model with random intercept.

| Dependent variables | Independent variables | B      | SE of B | <i>P</i> value |
|---------------------|-----------------------|--------|---------|----------------|
| VEGF volume         | Intercept             | 4607   | 26781   | 0.865          |
|                     | Leaking lesion        | 131529 | 47116   | 0.009          |

Note: B, unstandardized coefficient; SE, standard error; VEGF, vascular endothelial growth factor.
